# Supplementary material for: SynPAnal: Software for Rapid Quantification of the Density and Intensity of Protein Puncta from Fluorescence Microscopy Images of Neurons
Source: PubMed Central journal article supplement (PMC4274056; doi:10.1371/journal.pone.0115298), 2014-12-22

# SynPAnal User Manual

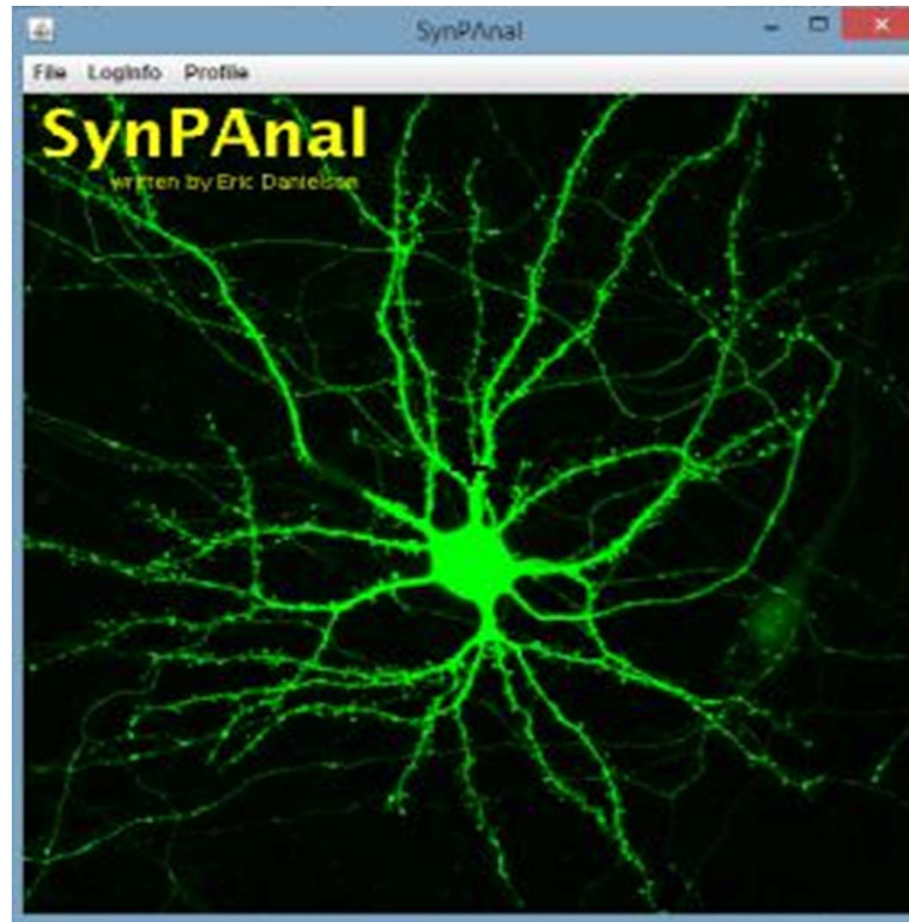

**Eric Danielson and Sang H. Lee**  
*Medical College of Wisconsin*

# Installation Instructions

Make sure the most recent version of JAVA is installed and is functioning. Unzip the SynPAnal\_Installation.zip file into a new directory. A SynPAnal.jar file and directories “ext” and “profiles” should be created. Double click the SynPAnal.jar file to run the software.

# Software Overview

SynPAnal is designed to aid the quantification of puncta from within the dendrites of neurons.

The steps of image analysis are as follows:

- 1) The user starts the software and opens all images to be analyzed. All images should be stored in the same directory and should be 8-bit RBG color TIFF files. SynPAnal can open 16-bit images but will convert them to 8-bit images.
- 2) The user should choose what data should be written, where the data should be written and from what color the data should be collected.
- 3) The user should then set the desired threshold. Once the threshold is set it will be saved and reloaded. The current threshold setting will be applied to all subsequent opened images unless the images have been thresholded previously, in which case the saved threshold will be loaded.
- 4) The user will then choose what regions will be analyzed by drawing either dendrite objects or general region objects onto the image. Puncta will automatically be quantified within the dendrite objects. Undesired puncta can be “removed” by right-clicking the puncta to clean up any errors.
- 5) The user then proceeds to the next image, All region information is saved automatically, all data is written automatically and the current setting are applied to the next image (unless already analyzed).
- 6) The user continues in this fashion until all images are analyzed. Following analysis, data is copied and pasted from the data text files and into excel for further analysis.

# Introductory Screen

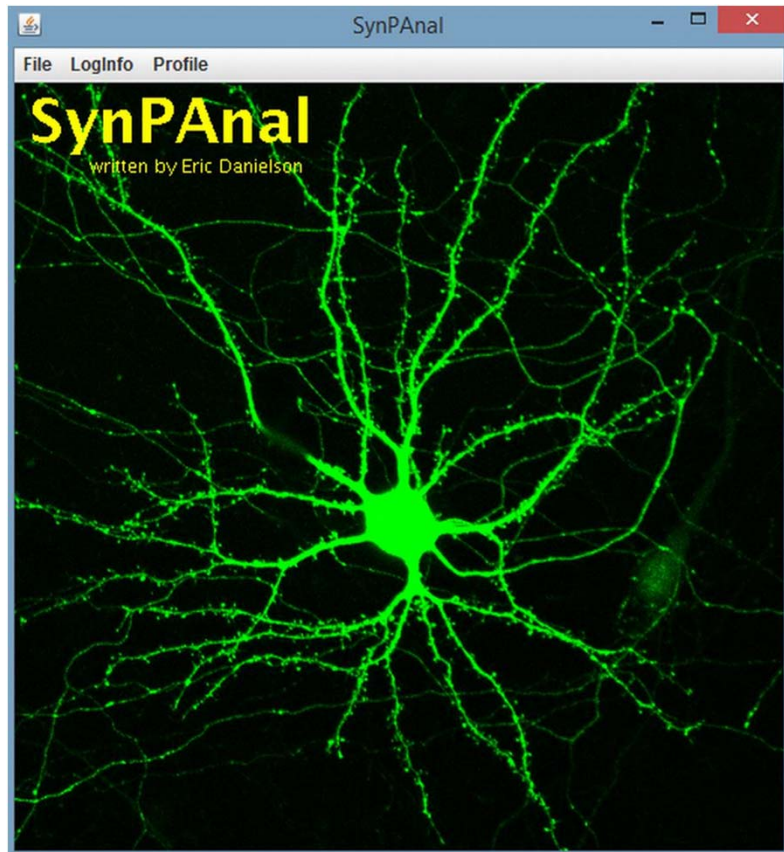

## Introductory Screen

Starting the software will bring up the introductory screen containing a menubar with 3 menubar items: File, LogInfo and Profile.

### File Menu

- Open: Allows the user to select what images will be analyzed.
- Change Log Directory: Allows the user to select the directory where the data will be written. The default directory is the directory that contains SynPAnal.
- Close: Exits the software.

### LogInfo

- Data Output Colors: Allows the user to select data from what color channel will be output to a file.
- Data Output Type: Allows the user to select what type of data will be written to a file. The LogInfo section contains more information about these options.

### Profile

- Calibration information can be stored into profiles and loaded by selecting the desired profile. Future versions of the software may contain more complex information in profile files.

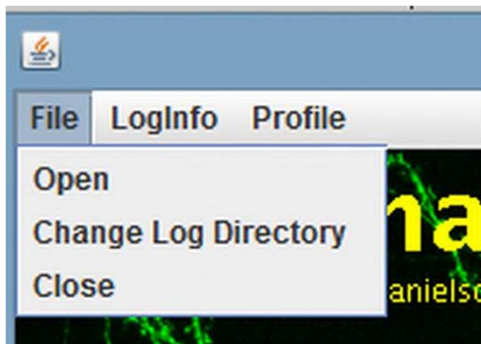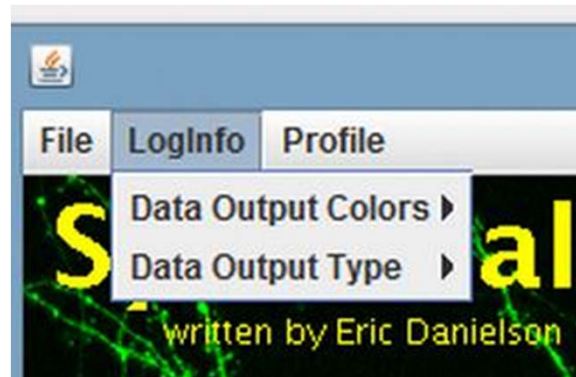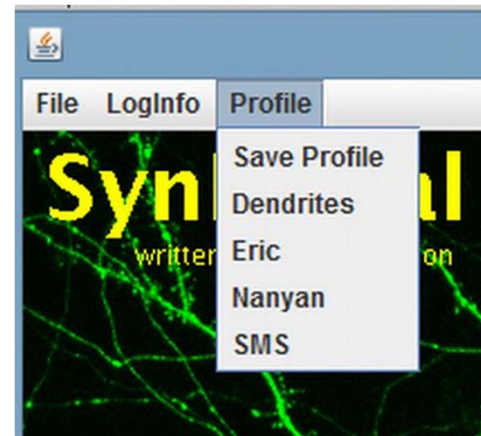

# Data Logging

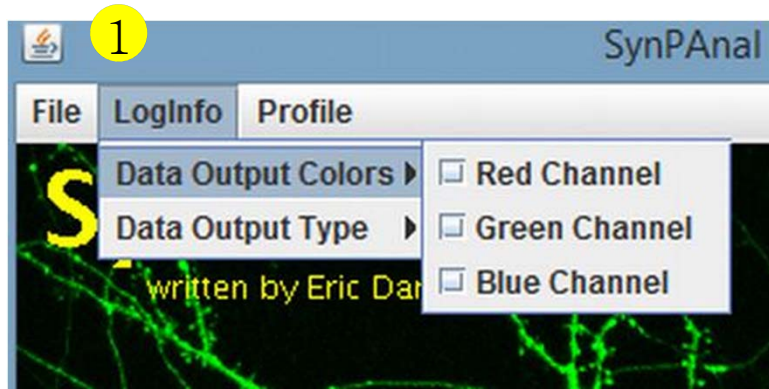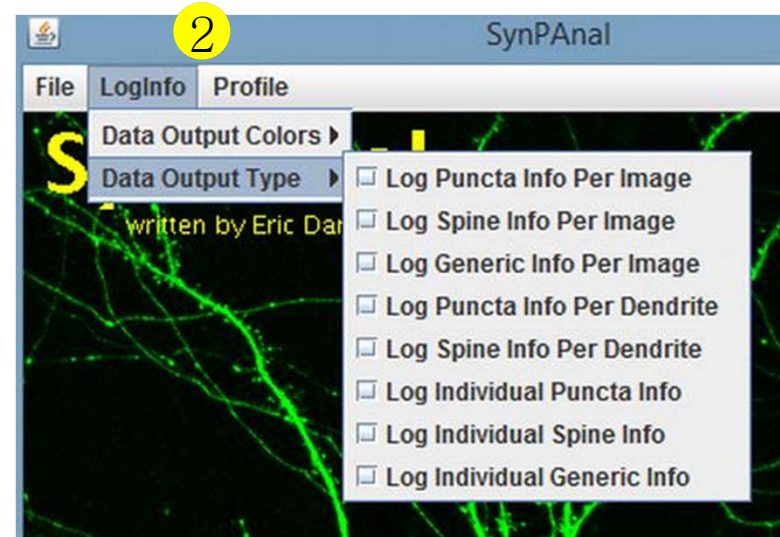

## Data Output Colors (1)

Before data can be written to a file the user must select the channel from which the data measurements will be collected. 0-3 channels can be selected.

\*Known bug for spine dimension analysis a color must also be selected.

## Data Output Type (2)

Before Data will be written to a file the user must select what data will be written. Any number can be selected at a time.

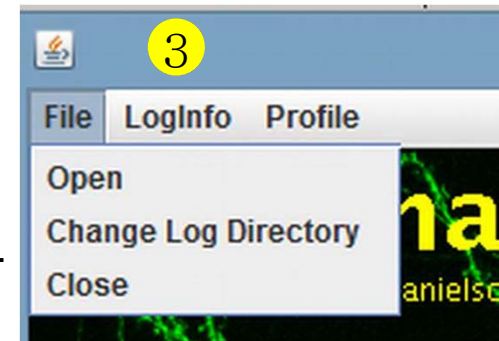

## Change Log Directory (3)

The default directory where the data will be written is the directory containing SynPAnal.jar . The user can choose a different directory if desired.

## Auto Data Logging (4)

Left clicking the Button (4) will manually write data to a file. Generally this is not needed as data is written to a file as the user progresses to the next image. (This feature was included if only one image was being analyzed). Additionally the user can deactivate Auto Data Logging by right clicking button (4). The Auto text will disappear from the button. (This feature was included so users could go back to previous images without duplicating the data written to a file.

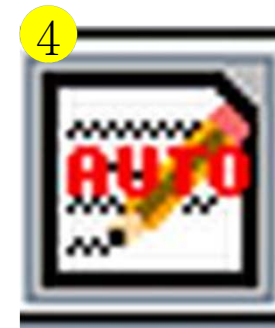



# Analysis Screen

The screenshot shows the SynPAnal software interface. The main window displays a neuron image with red and green channels. The toolbar at the top contains various icons for image processing and navigation. The data panel on the right shows 'Neuron Data' with a table of dendrite measurements. The thresholding panel at the bottom allows for adjusting image parameters for Red, Green, and Blue channels.

File LogInfo Profile

pSuper-GFP\_mPSD-95\_1.tif

Ctrl Transfected

Red Green Blue

Neuron Data

Ave Puncta Number 0  
Ave Puncta Intensity 0  
Ave Puncta Area 0  
Ave Intensity / Length 0

| Dendrite | Length | Puncta Den |
|----------|--------|------------|
| 0        | 30.98  | 0          |
| 1        | 28.96  | 0          |
| 2        | 34.39  | 0          |
| 3        | 29.4   | 0          |
| 4        | 26.42  | 0          |

Puncta Name Puncta Intensity

Red low 256 high 256 alpha LUT  
Green low 256 high 256 alpha LUT  
Blue low 256 high 256 alpha LUT

Width 20  
Calibration 0.12726

- 1 Image Panel: Draws image, threshold overlay and displays region objects where data measurements will occur
- 2 Zoom Panel: Controls image magnification and display of red green and blue color channels
- 3 Button Panel: Contains buttons for creation of measurement tools, writing data to a file and for controlling navigation to and from images
- 4 Data Panel: Displays current data
- 5 Thresholding Panel: Displays tools for adjusting image thresholding, threshold overlay display and image channel look up tables

# Zoom Panel

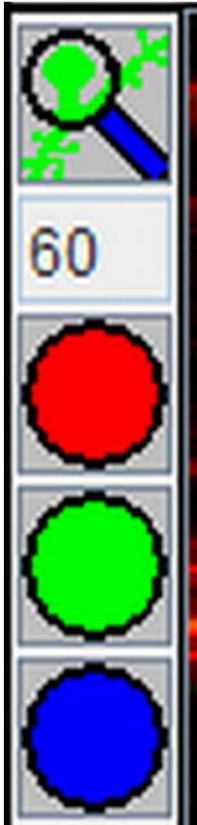

Toggles “Zoom” mode. Zoom in and out controlled by mouse wheel or “+” and “-” keys

Text box displaying zoom factor (adjustable)

Toggles whether red channel is displayed or hidden

Toggles whether green channel is displayed or hidden

Toggles whether blue channel is displayed or hidden

# F-Key Button Panel

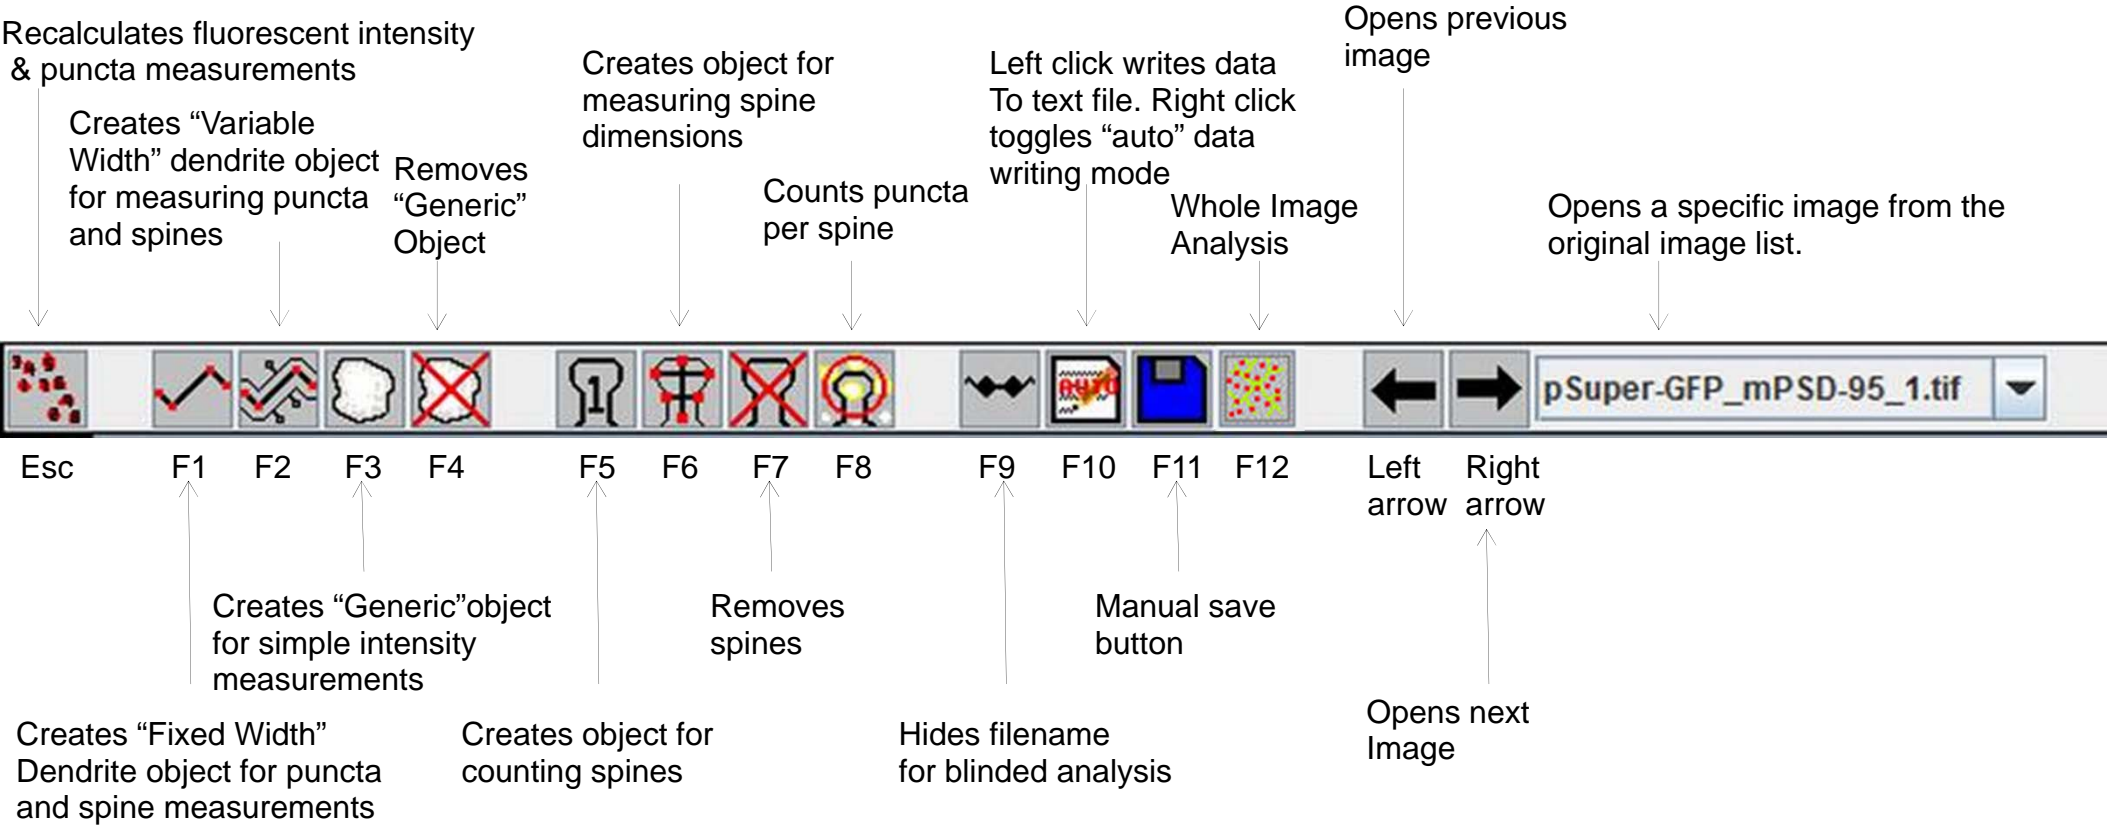

- These buttons control:
- 1) The addition/removal of regions used for performing measurements.
  - 2) Saving and writing data to a file
  - 3) Navigation to and from images.

The layout of the buttons is supposed to mimic the F-Key layout on a standard keyboard. Esc, F1-12 and left and right arrows also trigger the button function



# Thresholding Panel

## Red threshold controls

Red low 256

White  high 256

alpha

LUT

## Green threshold controls

Green low 256

White  high 256

alpha

LUT

## Blue threshold controls

Blue low 256

White  high 256

alpha

LUT

Width 20

Calibration 0.12726

Channel to be thresholded    Threshold value (adjustable)

Red low 256

White  high 256

alpha

LUT

Low threshold slider

High threshold slider

Threshold overlay transparency slider

Image look up table slider

Threshold overlay color

Width 20

“Fixed Width” dendrite width. (adjustable)

Calibration 0.12726

Calibration factor: microns per pixel (adjustable and can be loaded from profile information)

# Data Panel

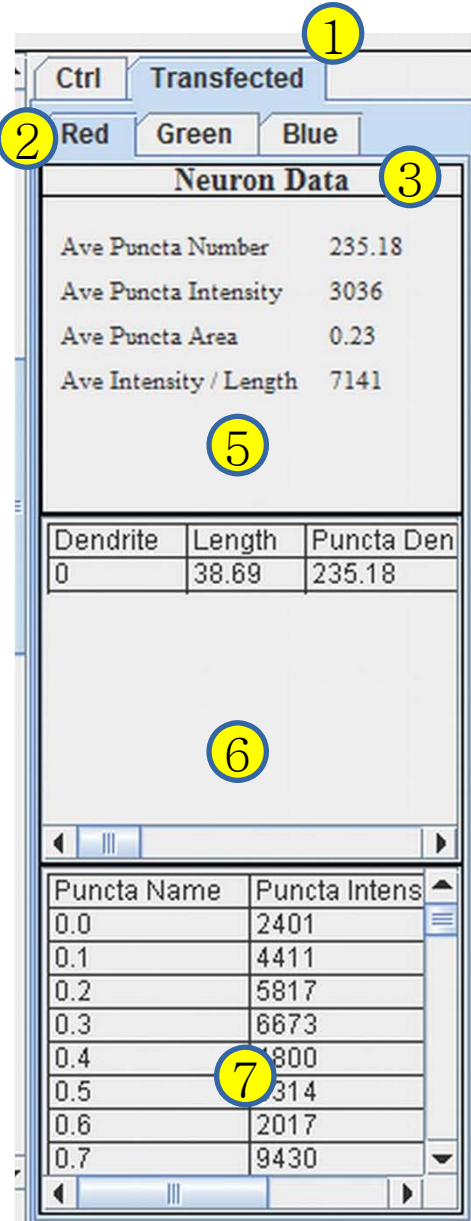

## Group Tab Panels

The tab panels will allow you to switch between groups of objects that belong to each tab. It will also display information about measurements taken by those objects. In the left example two tabs have been set up. "Ctrl" and "Transfected" (1). The user can click on the one of the tabs to highlight it. Currently the "Transfected" tab (1) is highlighted. When this tab is highlighted the user can create and modify objects in this tab group. e.g. Dendrite objects added to the image when the "Transfected" tab is highlighted will be hidden when the "Ctrl" tab is highlighted. Additionally data from each tab group will be calculated, displayed and output separately. This will allow for separate populations i.e. "Transfected" and "Non-transfected" neurons to be analyzed in the same image.

## Color Tabs

The user can click on "Red", "Green" or "Blue" sub-tabs(2) to display color specific information.

## Data Types

The user can click on "Neuron Data" (3) to cycle between "Puncta Info", "Spine Info" and "Cell region Info"

## Data Panels

The Neuron Panel (5) contains information averaged per image. The Dendrite Panel (6) contains information averaged per dendrite. The Individual Panel (7) contains the individual puncta, spine or generic region object information.

## Adding and Removing Tab Panels

New groups can be created by right clicking the group tab and choosing add tab(8). Deleting a tab removes the tab and all regions associated with it. (This cannot be undone)

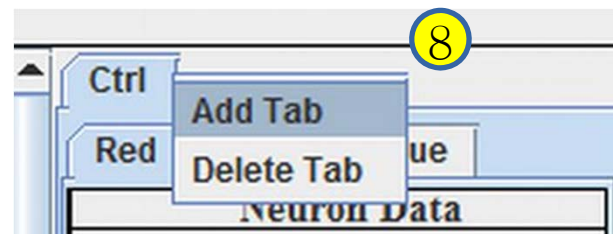

# Dendrite Objects

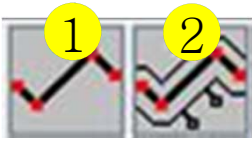

## Fixed Width Dendrites

Clicking on button (1) or pressing “F1” will activate “Add Fixed Width Dendrite” mode. Once this mode is activated left clicking anywhere on the opened image will add a vertex to the dendrite object. Right clicking will remove vertices. The user should use this mode to add vertices to the center of the dendrite to be traced. Double left clicking will add the final vertex and will create a fixed width dendrite. Width is altered by changing width value in the Threshold Panel. All fixed width dendrites will have the same width. Addition of a dendrite will also trigger the automatic counting of puncta.

## Variable Width Dendrite

Clicking on button (2) or pressing F2 will activate “Add Variable Width Dendrite” mode. As with the fixed width mode left clicking and right clicking will add and remove vertices and double clicking will add the final segment. After doubling clicking the user will hold down the left mouse button to trace the desired region around the dendrite. Double clicking will finish tracing the region.

## Dendrite View

Pressing the V key cycles through a solid and open dendrite view mode.

## Dendrite Data Panel

Measurements from dendrites can be excluded from the analysis by “ignoring” specific dendrites. This is done by right clicking the desired dendrite row in the Dendrite Data Panel. Ignored dendrites will be colored a dark grey in the data panel. Left clicking the dendrite row in the Dendrite Data Panel will bring that dendrite into view in the main image.

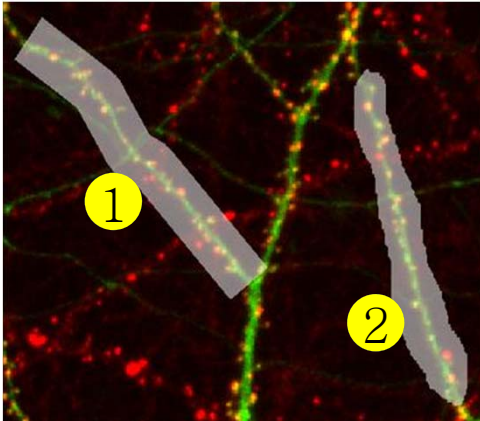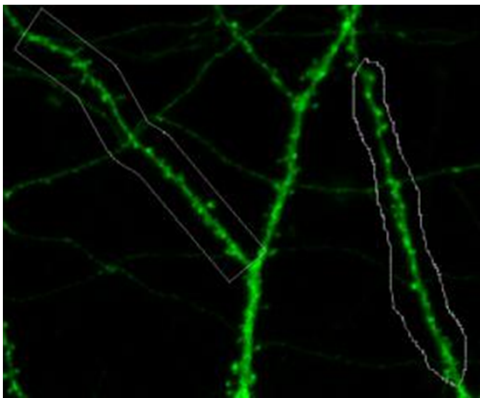

| Dendrite | Length | Spine Dens |
|----------|--------|------------|
| 0        | 28.66  | 20.94      |
| 1        | 26.66  | 0          |
| 2        | 22.79  | 39.49      |
| 3        | 19.85  | 65.49      |
| 4        | 27.43  | 65.63      |
| 5        | 26.02  | 0          |
| 6        | 22.53  | 71.02      |

Ignore all puncta  
Restore all puncta  
Invert all puncta  
Delete Dendrite

## Right Click Options

Holding down the right mouse button over a dendrite brings up various options. Ignore all/Restore all puncta will exclude/include all puncta within the dendrite from analysis. Invert all puncta will swap which puncta are included/excluded. The delete dendrite object will permanently delete the dendrite and all puncta.

# Puncta Objects

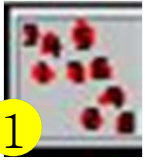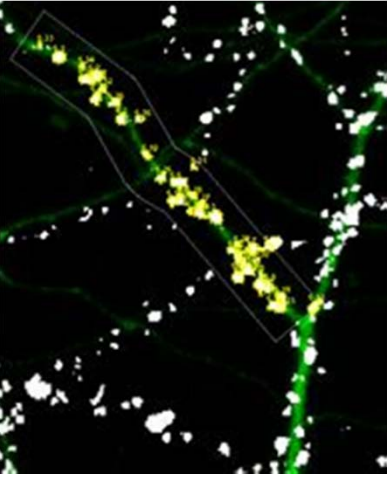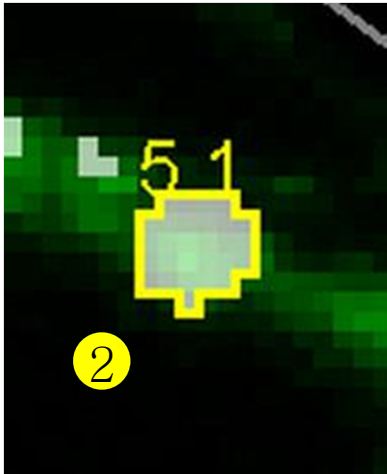

## Counting Puncta

Clicking on Button (1) or pressing Esc key will automatically add puncta objects within drawn dendrite objects. A yellow border will be drawn around all puncta objects and the puncta label drawn adjacent to the puncta. (2) Puncta are labeled as “X.Y”: X indicates which dendrite the puncta belongs to and Y indicates the order in which the puncta was found. Puncta cannot be deleted but can be excluded from the measurement by right clicking the puncta object or the puncta row in the puncta data panel. To count puncta dendrite objects must be present and the image must be thresholded for the desired color channel.

## Puncta Data Panel

Puncta data is displayed averaged per image (3), per dendrite (4) or for each individual puncta (5). Ignored puncta rows are colored dark gray. Values from ignored puncta do not contribute to the final totals and are not output to a file.

Ctrl

Red Green Blue

**Neuron Data**

|                        |       |
|------------------------|-------|
| Ave Puncta Number      | 83.45 |
| Ave Puncta Intensity   | 4982  |
| Ave Puncta Area        | 0.53  |
| Ave Intensity / Length | 3633  |

3

| Dendrite | Length | Puncta Den |
|----------|--------|------------|
| 0        | 28.66  | 52.34      |
| 1        | 26.66  | 7.5        |
| 2        | 22.79  | 87.76      |
| 3        | 19.85  | 146.08     |
| 4        | 27.43  | 131.25     |
| 5        | 26.02  | 3.84       |
| 6        | 22.53  | 155.35     |

4

| Puncta Name | Puncta Intens |
|-------------|---------------|
| 0.0         | 5363          |
| 0.1         | 6604          |
| 0.2         | 9714          |
| 0.3         | 14886         |
| 0.4         | 6602          |
| 0.5         | 12205         |
| 0.6         | 8963          |
| 0.7         | 3226          |

5



# Spine Objects

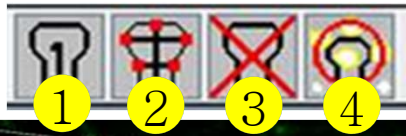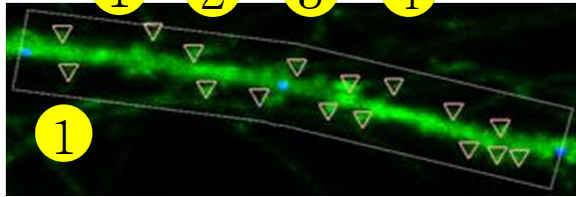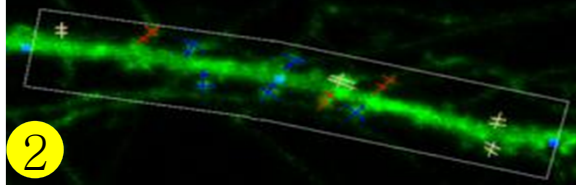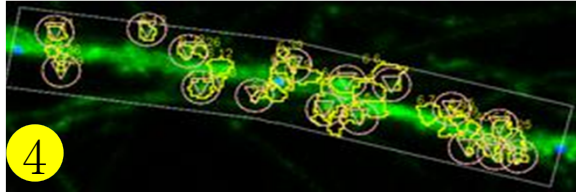

## Counting Spine Objects

Clicking on Button (1) or pressing F5 will allow the user to add counting spine objects. The user can continue adding spines until finished. To end “Add Spine” mode the user should left click anywhere outside of a dendrite object. This mode adds spines quickly and is exclusively for calculating spine density

## Measuring Spine Objects

Clicking on Button (2) or Pressing F6 will activate “Measure Spine” mode. In this mode 3 segments will be added in this order “Spine length”, “Spine Head Width” and “Spine Neck Width”. These measurements will be used to categorize the spines into Mushroom, Thin, Stubby and Filopodia. Mushroom spine will be drawn blue, thin red, stubby pink and filopodia yellow. Spine density will also be calculated

## Punca per spine mode

Clicking on Button (4) or pressing F8 will allow the user to automatically remove puncta that do not fall within a specific radius of the spine. Pgup and pgdn increase or decrease the radius. The number of spines with 0, 1, 2 or  $\geq 3$  puncta will be calculated.

## Deleting Spines

Clicking Button (3) or F7 activates “Remove Spine”. Clicking on spines during this more removes spines. Removing a spine deactivates this mode.

## Spine Data Pane

Spine Data is averaged per Image, per dendrite or individually.

### Right Click Options

Holding down the right mouse button over a spine will allow you to manually specify the spine type.

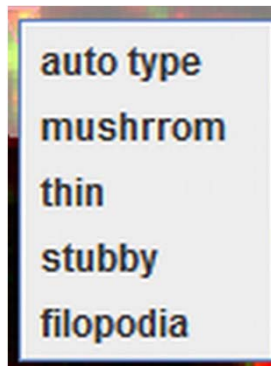

Ctrl

Red Green Blue

**Neuron Data**

Ave Spine Num: toggles data mode

Ave Spine Head Width : 0.6

Ave Spine Length : 0.68

Mushroom : 14.19

Thin : 7.95

Stubby : 15.38

Filopodia : 0

| Dendrite | Length | Spine Dens |
|----------|--------|------------|
| 0        | 28.66  | 20.94      |
| 1        | 26.66  | 0          |
| 2        | 22.79  | 39.49      |
| 3        | 19.85  | 65.49      |
| 4        | 27.43  | 65.63      |
| 5        | 26.02  | 0          |
| 6        | 22.53  | 71.02      |

| Spine Name | Head Width |
|------------|------------|
| 0.0        | 0.77       |
| 0.1        | 1.03       |
| 0.2        | 0.85       |
| 0.3        | 0.89       |
| 0.4        | 0.8        |
| 0.5        | 0.64       |
| 2.0        | 0.9        |
| 2.1        | 0.81       |
| 2.2        | 0.4        |



# Generic Regions

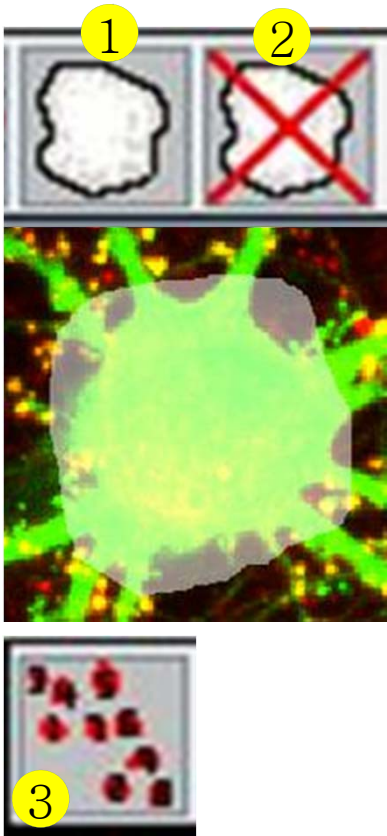

## Add Generic Region

Clicking on Button (1) or pressing F3 will activate “Add Generic Region” mode. The user will left click and hold down the left mouse button to trace the desired region. Releasing the mouse button will finalize the region. This mode will stay active until the user double clicks on the image. After tracing, the average intensity per image will be automatically calculated. Changing the threshold settings will require Button (3) to be pressed to update the calculation.

## Remove Generic Region

Clicking on Button (2) or pressing F4 will activate “Remove Generic Region” mode. Left clicking on any cell body object will permanently delete it.

## Generic Region Data

Data for each color is displayed in the data pane. Data is averaged per image or displayed individually. Integrated intensity is the sum of pixel intensities for all pixels (above threshold) within the designated area of the region. Ave intensity is the integrated intensity divided by the area of the region.

Ctrl

Red Green Blue

**Neuron Data**

|                      |          |
|----------------------|----------|
| Ave Intensity        | 1648.95  |
| Integrated Intensity | 246942.2 |
| Region Number        | 5        |

Dendrite Info

| Region Number | Integrated Inte |
|---------------|-----------------|
| 0             | 1106896         |
| 1             | 23009           |
| 2             | 45751           |
| 3             | 8558            |
| 4             | 50497           |

# Whole Image Analysis

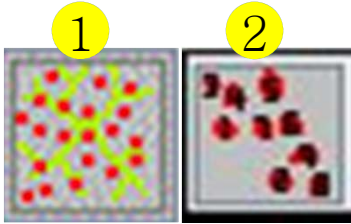

## Add Whole Image Analysis Region

Clicking on Button (1) or pressing F12 will add a “dendrite” object that encompasses the entire width so the entire image can be analyzed at once. Like dendrite objects, the image must be thresholded for puncta to be detected. The length of this region will be 0 and cannot be changed. Puncta Density(A) = Puncta number / Area. Clicking on Button (2) will recalculate puncta density.

## Remove Generic Region

The region can be removed by right clicking and selecting “Remove Dendrite”

## Generic Region Data

Data for each color is displayed in the data pane. Data is averaged per image or displayed individually. Integrated intensity is the sum of pixel intensities for all pixels (above threshold) within the designated area of the region. Ave intensity is the integrated intensity divided by the area of the region. Puncta Density(L) will be infinite due to length 0. Puncta Density (A) is Puncta number divided by the area. Puncta Intensity / Length is infinite. Puncta Intensity / Area is the Integrated intensity divided by the area.

Ctrl

Red Green Blue

**Neuron Data**

|                           |        |
|---------------------------|--------|
| Puncta Density(L)         | ∞      |
| Puncta Density(A)         | 1.4698 |
| Puncta Intensity          | 3158   |
| Puncta Area               | 0.21   |
| Puncta Intensity / Length | ∞      |
| Puncta Intensity / Area   | 4.64E2 |

| # | Dendrite Length | Dendrite A |
|---|-----------------|------------|
| 0 | 0               | 16981.8    |

| Puncta Name | Puncta Intens |
|-------------|---------------|
| 0.0         | 2617          |
| 0.1         | 4660          |
| 0.2         | 3810          |
| 0.3         | 4240          |
| 0.4         | 2335          |
| 0.5         | 3741          |
| 0.6         | 3430          |
| 0.7         | 6263          |
| 0.8         | 5985          |
| 0.9         | 7744          |
| 0.10        | 1693          |
| 0.11        | 3549          |
| 0.12        | 9989          |
| 0.13        | 4400          |

# Right Click Options for Image Panel

- Restore all Puncta
- Hide Dendrites
- Invert Ignored Puncta
- Auto Ignore Criteria (%)
- Auto Ignore Criteria (Overlapping)
- Set Dendrite Puncta Limit
- Clear All Regions

## Restore all Puncta

Makes all puncta visible.

## Show/Hide Dendrites

Makes all objects Visible/Invisible

## Invert Ignored Puncta

Makes Ignored puncta visible and sets visible puncta to Ignored

## Auto Ignore Criteria (%)

(1) Auto Ignores puncta based on percent overlap (area) with chosen thresholded color.

## Auto Ignore Criteria (Overlapping)

(2) Auto Ignores puncta based on overlap with non thresholded color.

## Set Dendrite Puncta Limit

(3) Auto Ignores all puncta smaller than set size. (Must be  $\geq 4$ )

## Clear All Regions

All regions are permanently removed.

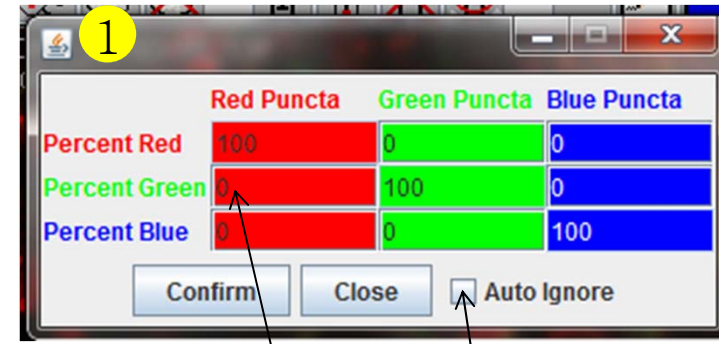

A value of 50 will remove any red puncta that overlaps (thresholded) green by 50%.

Will apply set criteria to each new region object added automatically for each new image analyzed

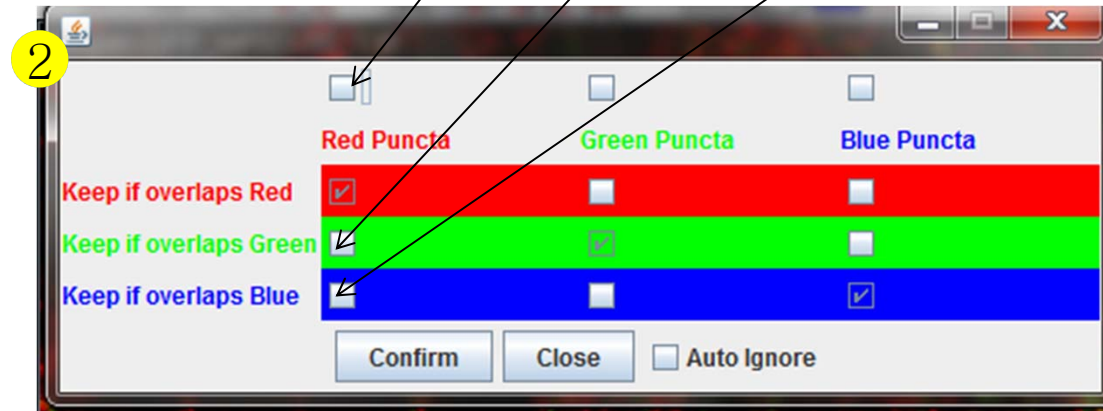

Check to remove Red puncta that overlap with green (if checked) or blue (if checked)

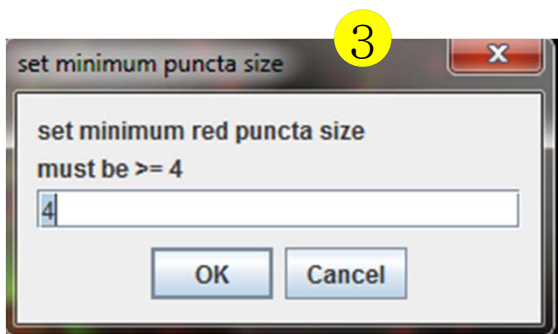

Supplement: pone.0115298.s001.pdf [file pone.0115298.s001.pdf]
